# Supplementary material for: Microbiota-based model improves the sensitivity of fecal immunochemical test for detecting colonic lesions
Source: PubMed Central journal article supplement (PMC4823848; doi:10.1186/s13073-016-0290-3), 2016-04-06
Supplement: 13073_2016_290_MOESM4_ESM.pdf [file 13073_2016_290_MOESM4_ESM.pdf]

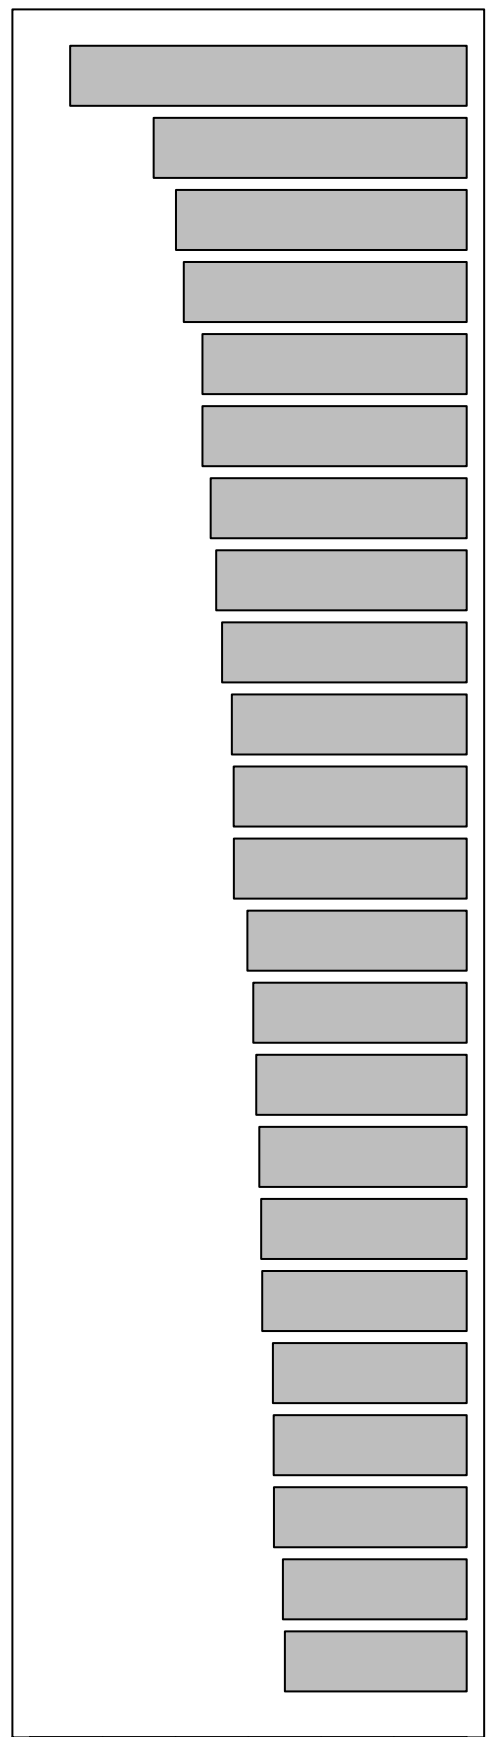

Lachnospiraceae (OTU14)  
 Ruminococcus (OTU11)  
 Lachnospiraceae (OTU44)  
 Ruminococcaceae (OTU29)  
 Bacteroides (OTU3)  
 Bacteroides (OTU7)  
 Porphyromonas (OTU105)  
 Anaerostipes (OTU8)  
 Lachnospiraceae (OTU88)  
 Blautia (OTU13)  
 Faecalibacterium (OTU6)  
 Clostridiales (OTU10)  
 Bacteroides (OTU2)  
 Roseburia (OTU5)  
 Parabacteroides (OTU49)  
 Enterobacteriaceae (OTU28)  
 Lachnospiraceae (OTU32)  
 Blautia (OTU9)  
 Lachnospiraceae (OTU60)  
 Lachnospiraceae (OTU87)  
 Firmicutes (OTU282)  
 Ruminococcus (OTU16)  
 Collinsella (OTU19)

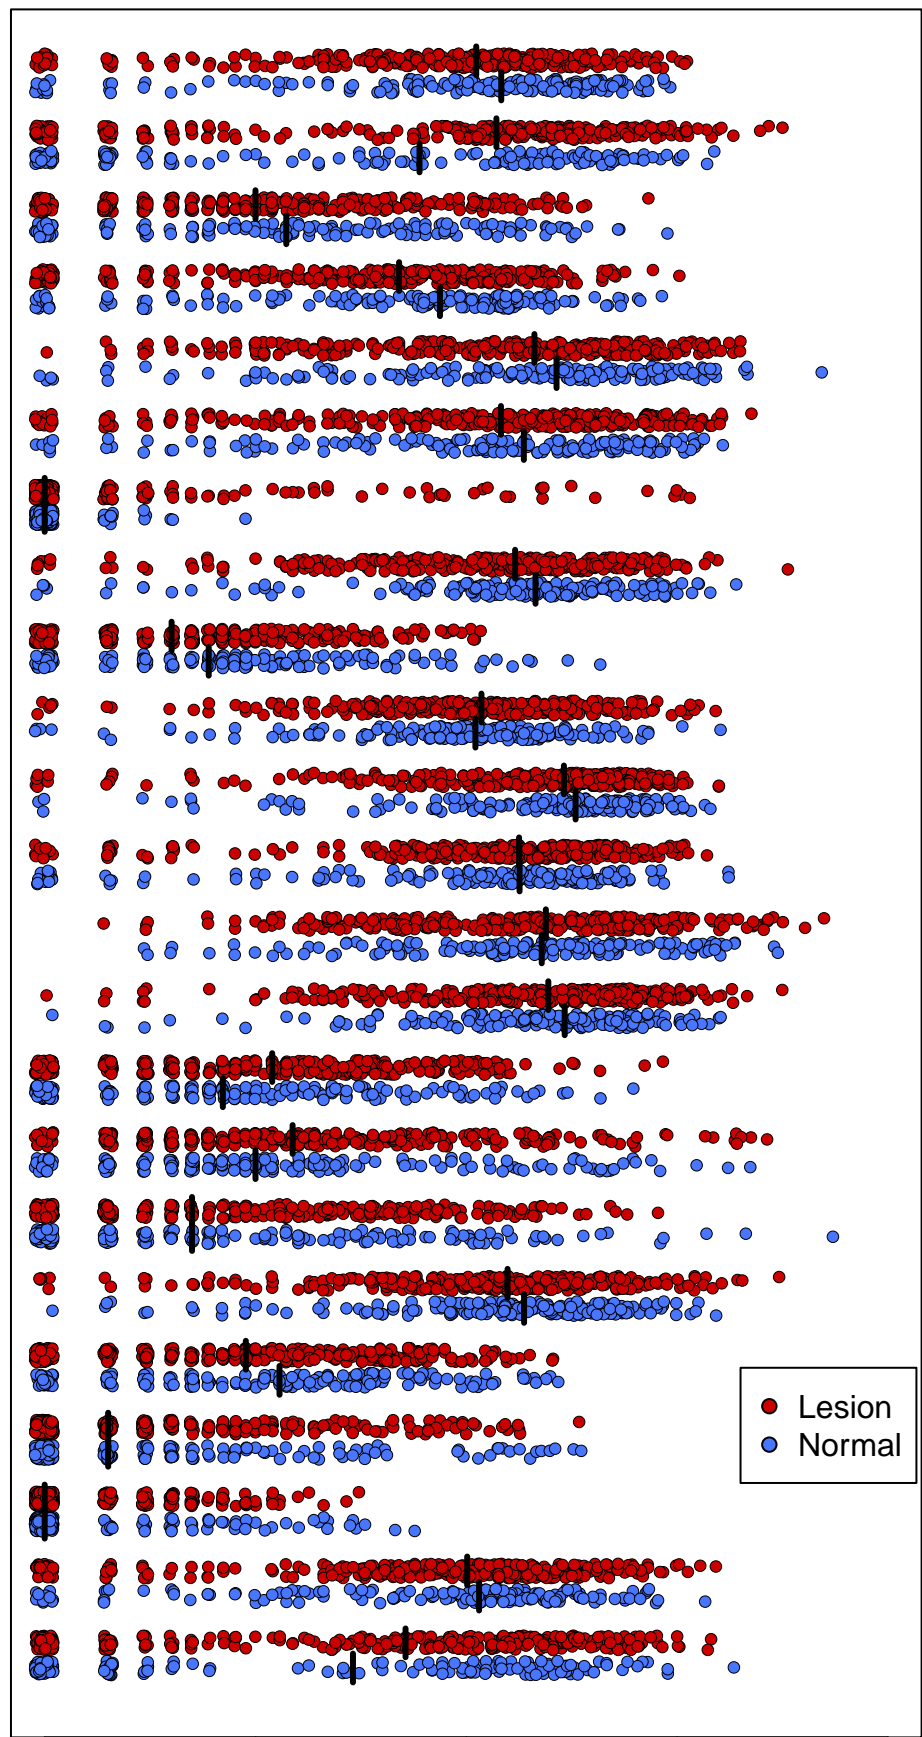

● Lesion  
 ● Normal

3.0 2.5 2.0 1.5 1.0 0.5 0.0  
 Variable Importance  
 (Mean Decrease Gini)

0 0.1 1 10 100  
 Relative Abundance (%)
