# Supplementary material for: Microbiota-based model improves the sensitivity of fecal immunochemical test for detecting colonic lesions
Source: PubMed Central journal article supplement (PMC4823848; doi:10.1186/s13073-016-0290-3), 2016-04-06

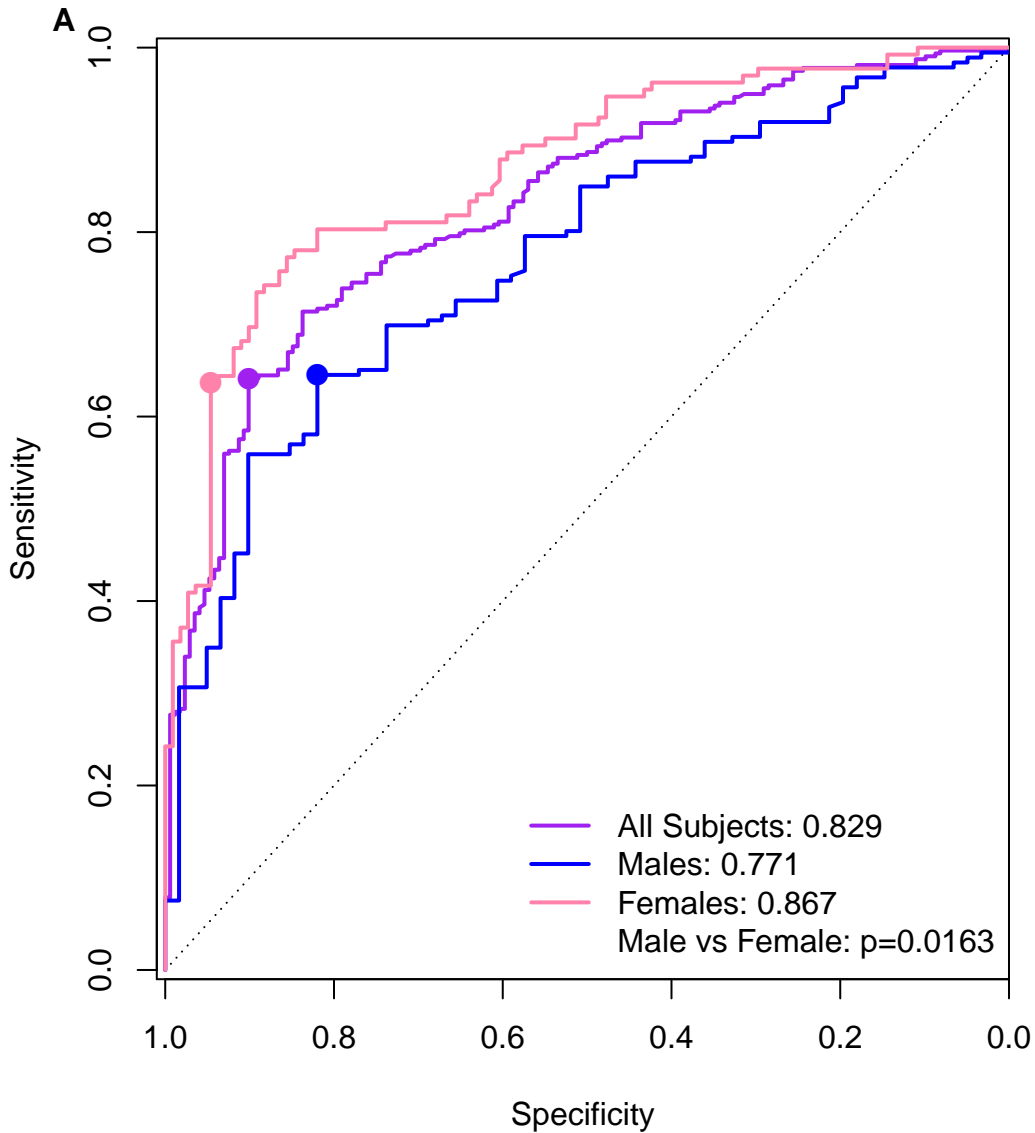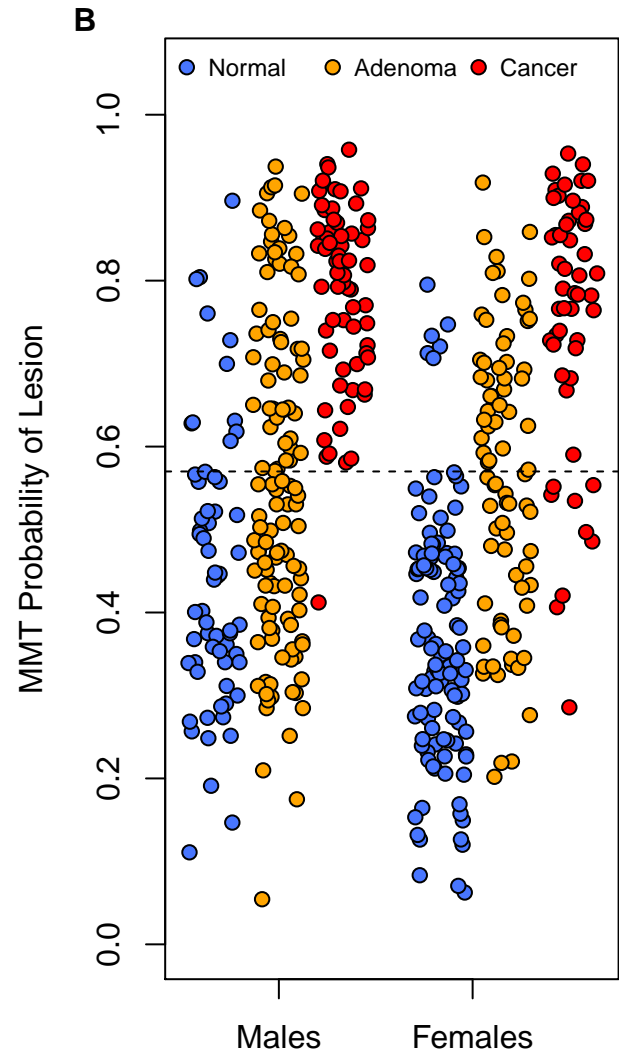

Supplement: 13073_2016_290_MOESM6_ESM.pdf [file 13073_2016_290_MOESM6_ESM.pdf]
